# Supplementary material for: Overexpression long non-coding RNA LINC00673 is associated with poor prognosis and promotes invasion and metastasis in tongue squamous cell carcinoma
Source: PubMed Central journal article supplement (PMC5369989; doi:10.18632/oncotarget.14200), 2016-12-25
Supplement: oncotarget-08-16621-s001.pdf [file oncotarget-08-16621-s001.pdf]

## **Overexpression long non-coding RNA *LINC00673* is associated with poor prognosis and promotes invasion and metastasis in tongue squamous cell carcinoma**

### **SUPPLEMENTARY TABLE**

**Supplementary Table 1: Clinical information and expression of *LINC00673* in TSCC patients.**

See Supplementary File 1
